# Supplementary material
Source: HighWire-hosted journal article supplement (https://www.cmajopen.ca/highwire/filestream/81270/field_highwire_adjunct_files/1/2019-0195-original-submission.pdf)

1  
2  
3 1 Diabetes during pregnancy and perinatal outcomes among First Nations women in Ontario: A  
4 2 population-based cohort study, 2002-2014  
5 3

6 4 Maria P. Vélez, MD, PhD<sup>1,2</sup>

7 5 Morgan Slater, PhD<sup>3,4</sup>

8 6 Rebecca Griffiths, MSc<sup>3</sup>

9 7 Baiju R Shah, MD PhD<sup>3,5,6</sup>

10 8 Roseanne Sutherland<sup>7</sup>

11 9 Carmen Jones<sup>7</sup>

12 10 Kristen Jacklin, PhD<sup>8</sup>

13 11 Jennifer D Walker, PhD<sup>3,9</sup>

14 12 Michael E Green, MD MPH<sup>3,4,10</sup>

15 14 <sup>1</sup> Department of Obstetrics and Gynecology, Queen's University, Kingston, Ontario

16 15 <sup>2</sup> Department of Public Health Sciences, Queen's University, Kingston, Ontario

17 16 <sup>3</sup> ICES, Toronto, Ontario

18 17 <sup>4</sup> Department of Family Medicine, Queen's University, Kingston, Ontario

19 18 <sup>5</sup> Division of Endocrinology, Sunnybrook Health Sciences Centre, Toronto, Ontario

20 19 <sup>6</sup> Department of Medicine, University of Toronto, Ontario

21 20 <sup>7</sup> Chiefs of Ontario, Toronto, Ontario

22 21 <sup>8</sup> Memory Keepers Medical Discover Team, Department of Family Medicine and Biobehavioral  
23 22 Health, University of Minnesota Medical School, Duluth, Minnesota

24 23 <sup>9</sup> School of Rural and Northern Health, Laurentian University, Sudbury, Ontario

25 24 <sup>10</sup> Health Services and Policy Research Institute, Queen's University, Kingston, Ontario

26 26 Correspondence to: Maria P. Velez, Department of Obstetrics and Gynecology, Queen's  
27 27 University, Victory 4, 76 Stuart St., Kingston, ON, K7L 2V7, Canada; maria.velez@queensu.ca  
28 28

29 29 Competing interests: None declared.  
30 30

31 31 Funding Statement: Funding is provided by the Ontario SPOR SUPPORT Unit, which is  
32 32 supported by the Canadian Institutes of Health Research and the Province of Ontario. Additional  
33 33 support was provided by Dr. Green through the Brian Hennen Chair in Family Medicine, Dr.  
34 34 Walker through a Tier 2 Canada Research Chair in Indigenous Health, Dr. Slater through a  
35 35 Health System Impact Fellowship from the Canadian Institutes of Health Research, and ICES.  
36 36 ICES is funded by an annual grant from the Ontario Ministry of Health and Long-Term Care  
37 37 (MOHLTC).

1  
2  
3 **38 Abstract**  
4  
5

6 **39 Background:** Diabetes during pregnancy is a significant risk factor for maternal and perinatal  
7  
8 **40** adverse events. In Canada, there are an increasing number of women, especially First Nations  
9  
10 **41** women, who are affected by diabetes during pregnancy.  
11

12  
13 **42 Methods:** Using administrative healthcare databases, we identified annual cohorts of pregnant  
14  
15 **43** women from 2002 to 2014 and identified those with pre-existing diabetes and gestational  
16  
17 **44** diabetes (GDM). We used the Indian Register to identify women who were First Nations. We  
18  
19 **45** estimated rates of maternal and infant adverse outcomes and measures of health care utilization  
20  
21 **46** in each population.  
22  
23  
24  
25

26 **47 Results:** First Nations women have a higher prevalence of pre-existing diabetes and GDM than  
27  
28 **48** other women in Ontario. We found significantly higher rates of preeclampsia, labour induction,  
29  
30 **49** and Caesarean deliveries in First Nations women. First Nations women were not at a higher risk  
31  
32 **50** of pre-term birth compared to other women in Ontario and although First Nations babies were  
33  
34 **51** larger for gestational age, obstructed labor rates were similar in First Nations women and other  
35  
36 **52** women. While almost all First Nations women, regardless of diabetes status, were seen by a  
37  
38 **53** primary care provider during pregnancy, they had less utilization of speciality care. Only 15% of  
39  
40 **54** all pregnant women with pre-existing diabetes visited an ophthalmologist during pregnancy.  
41  
42  
43  
44

45 **55 Interpretation:** Our results confirm disparities in maternal and perinatal outcomes between First  
46  
47 **56** Nations women and other women in Ontario. Access to primary care for pregnant women seems  
48  
49 **57** adequate; access to specialized care especially for women with pre-existing diabetes needs to  
50  
51 **58** improve.  
52  
53  
54  
55  
56  
57  
58  
59  
60

## 59 Introduction

60 Diabetes during pregnancy, either pre-existing diabetes mellitus or gestational diabetes mellitus  
61 (GDM), is a major contributor of maternal and perinatal adverse events. In Canada, the number of  
62 women affected by diabetes during pregnancy has increased over time, which is associated with  
63 an increased risk of adverse maternal and perinatal outcomes. (1, 2) First Nations women have a  
64 high prevalence of diabetes, 2 to 5 times greater than other Canadian populations, (3-6) and a  
65 higher risk of adverse pregnancy outcomes. (7-10) There are complex social and historical factors  
66 that impact the lived experience of First Nations women, including the impacts of  
67 multigenerational trauma, residential schools, systemic racism, material deprivation and risks of  
68 violence, as described in major national inquiries (11, 12) and the academic literature. (13, 14)  
69 These factors must always be considered in any discussion of the health of First Nations women.  
70 In Canada, a handful of population-based studies have assessed health outcomes of pregnant First  
71 Nations women with diabetes. In Manitoba, data from 1985-2004, reported an increase in GDM  
72 prevalence over time with the prevalence in First Nations women 3-times greater than other  
73 populations. (15) In Ontario, data from 2002-2010, reported a higher prevalence of diabetes during  
74 pregnancy, less pregnancy care, and higher rates of adverse outcomes in First Nations women  
75 compared to the other population. (16) In Alberta, a recent study documented a higher prevalence  
76 of pre-existing diabetes and GDM among First Nations women, with the resulting higher rate of  
77 adverse pregnancy outcomes. (17) In Quebec, a recent study of births from 1996 to 2010 reported  
78 a higher prevalence of diabetes during pregnancy in First Nations women, and an increased risk of  
79 perinatal death in women with pre-existing diabetes largely in First Nations women. (18)

1  
2  
3  
4  
5  
6  
7  
8  
9  
10  
11  
12  
13  
14  
15  
16  
17  
18  
19  
20  
21  
22  
23  
24  
25  
26  
27  
28  
29  
30  
31  
32  
33  
34  
35  
36  
37  
38  
39  
40  
41  
42  
43  
44  
45  
46  
47  
48  
49  
50  
51  
52  
53  
54  
55  
56  
57  
58  
59  
60

80 The objective of the present study is to examine temporal trends in pregnancy outcomes, including  
81 both maternal and neonatal outcomes, and health services utilisation in a population-based cohort  
82 of First Nations women with diabetes during pregnancy compared with other women in Ontario.

Confidential

## 84 **Methods**

85 We conducted a population-based cohort study of all hospital deliveries from women 13-50 years  
86 old in Ontario from April 1, 2002 to March 31, 2015 using the comprehensive administrative health  
87 datasets housed by ICES. The general approach to the creation of the cohorts and description of  
88 the major dataset used are described elsewhere. (19) We identified mothers and newborns through  
89 the MomBaby2016 dataset, (20) which includes records derived from the Discharge Abstracts  
90 Database (DAD) for all mother-newborn pairs delivered in fiscal year 2002/2003 onward. We  
91 identified women who were First Nations using the Indian Register, which includes people who  
92 are recognized and registered as First Nations people by the Federal Government under the Indian  
93 Act. (21)

94 Exposures: We used the Ontario Diabetes Dataset (ODD) to identify mothers with pre-existing  
95 diabetes, defined as diagnosis of diabetes at any point before pregnancy. GDM was defined as the  
96 presence of one or more diagnostic codes of diabetes from hospital discharge abstract records or  
97  $\geq 2$  OHIP billings with diagnosis of diabetes (OHIP code 250) in the last 120 days of pregnancy,  
98 in the absence of pre-existing diabetes, a definition adapted from Booth et al., (22).

99 Outcomes: We compared the prevalence of pre-existing diabetes and GDM in First Nations women  
100 versus other women in Ontario. To estimate rates of maternal and infant outcomes, we linked data  
101 for mothers and their newborns using the DAD. Maternal outcomes included preeclampsia,  
102 induction of labor, obstructed labor, and caesarean deliveries. Infant outcomes included preterm  
103 birth (PTB,  $< 37$  weeks in gestational age), large for gestational age (LGA, defined as birth weight  
104  $> 90$ th percentile for gestational age according to Canadian growth curves), (23) and stillbirths.  
105 Health services utilization during pregnancy, including visits to internal medicine or  
106 endocrinology (for women with GDM or pre-existing diabetes), ophthalmology or optometry (for

1  
2  
3 107 women with pre-existing diabetes), obstetrics and gynecology, and primary care was determined  
4  
5 108 by examining physician billing claims in the Ontario Health Insurance Plan database for the period  
6  
7  
8 109 up to 280 days prior to delivery.  
9

10  
11 110 Analysis and ethics considerations: Maternal age was captured at time of delivery. Each delivery  
12  
13 111 was counted separately. Estimates of prevalence and maternal and infant outcomes were age-  
14  
15 112 standardized to 2002. The prevalence (per 1000 deliveries) of pre-existing diabetes and GDM in  
16  
17 113 First Nations women and other women in Ontario was estimated yearly from 2002/03 to 2014/15.  
18  
19  
20 114 The frequency of maternal and neonatal outcomes and their 95% CIs in each group were expressed  
21  
22 115 using rates (per 100 deliveries) for three periods (2002-2005, 2006-2009, 2010-2014). Age-  
23  
24 116 standardized rate ratios and 95% CI were used to contrast rates in different years and between First  
25  
26  
27 117 Nations women and other women in Ontario. The Cochran-Armitage Trend Test was used to assess  
28  
29 118 temporal trends.  
30

31  
32 119 Privacy considerations required the suppression of cells with small values ( $\leq 5$ ). All analyses were  
33  
34 120 carried out using SAS Enterprise Guide version 7.1 (SAS Institute, Cary, NC). The project  
35  
36  
37 121 received approval from the Chiefs of Ontario Data Governance Committee and the Research Ethics  
38  
39 122 Boards of Queen's University and Laurentian University.  
40

41  
42 123  
43

44 124  
45  
46  
47  
48  
49  
50  
51  
52  
53  
54  
55  
56  
57  
58  
59  
60

## 125 **Results**

126  
127 Between 2002 and 2014, there were a total 1,671,337 deliveries amongst 1,065,950 women in  
128 Ontario. Of these deliveries, 31,417 were in First Nations women (2%), and 1,639,920 in other  
129 women (98%). Mean age at delivery was 25.22 years ( $\pm 5.95$ ) in First Nations women and 30.12  
130 years ( $\pm 5.46$ ) among other women in Ontario. The prevalence of pre-existing diabetes and GDM  
131 was higher in First Nations pregnant women than other women in each of the years studied (Table  
132 1, Figure 1). During the study period, the rate of GDM increased among all women while the rate  
133 of pre-existing diabetes stayed the same in First Nations women and increased among other  
134 women.

135 Maternal outcomes are shown in Table 2. Rates of preeclampsia and labour induction were higher  
136 in First Nations women than other women, regardless of diabetes status. The differences were  
137 greater among those with diabetes than among women with no diabetes. Rates of obstructed labour  
138 were similar between First Nations women and other women with diabetes. Among women with  
139 no diabetes, the rates of obstructed labour were lower in First Nations women compared to other  
140 women. Rates of Caesarean deliveries were similar among First Nations women and other women  
141 with no diabetes. For women with diabetes, First Nations women have a higher rate of cesarean  
142 deliveries compared to other women.

143 Neonatal outcomes are shown in Table 3. First Nations women had similar rates of preterm birth  
144 compared to other women, regardless of diabetes status. Rates of LGA births were higher in First  
145 Nations women than other women; the gap was greater among those with diabetes than in women  
146 with no diabetes (half of First Nations women with diabetes had LGA infants). First Nations  
147 women with pre-existing diabetes had a higher rate of congenital anomalies compared to other  
148 women. Stillbirth rates were higher in First Nations women compared to other women regardless

1  
2  
3 149 of diabetes status. Stillbirth rates for both groups were highest among those with pre-existing  
4  
5 150 diabetes.

6  
7  
8 151 Table 4 presents health services utilization data. While the majority of women, independent of  
9  
10 152 diabetes status, are seen by a primary care provider at least once during pregnancy, the rate is  
11  
12 153 significantly lower in First Nations women with no diabetes and GDM. Most women with pre-  
13  
14 154 existing diabetes and GDM have seen an obstetrician or gynecologist, but the proportion is  
15  
16 155 significantly lower in First Nations women compared to other women in Ontario, as is the  
17  
18 156 proportion of women with diabetes who are seen by an internal medicine or endocrinology  
19  
20 157 specialist. Among women with pre-existing diabetes, there was no difference in visits to  
21  
22 158 ophthalmology or optometrist between First Nations women and other women; however, only 15%  
23  
24 159 of women with pre-existing diabetes saw an ophthalmologist or optometrist during pregnancy.  
25  
26  
27  
28  
29

### 30 **Interpretation**

31  
32 161 In line with previous population-based studies in Canada, (15, 16, 18, 24) our study indicates that  
33  
34 162 the prevalence of pre-existing diabetes and GDM is higher in pregnant First Nations women than  
35  
36 163 in other women in Ontario. As a result, pregnant First Nations women with diabetes are at a higher  
37  
38 164 risk of adverse maternal and perinatal outcomes that, if managed through appropriate health care  
39  
40 165 before and during pregnancy, may improve health inequalities in this population and its future  
41  
42 166 generations. Indeed, offspring to mothers with diabetes during pregnancy are likely to develop  
43  
44 167 diabetes at a younger age and may further propagate this intergenerational risk. (4, 25) This may  
45  
46 168 be one factor that contributes to the increasing incidence in diabetes in First Nations children noted  
47  
48 169 recently by our team. (26)  
49  
50  
51  
52

53 170 In relation to maternal outcomes, preeclampsia rates were higher in First Nations women than in  
54  
55 171 other women in Ontario regardless of diabetes status, though the difference is greater among  
56  
57  
58  
59  
60



1  
2  
3 172 women with pre-existing diabetes and GDM than in women with no diabetes. Oster et al. (17)  
4  
5 173 reported a lower rate of pregnancy-induced hypertension in First Nations women compared to  
6  
7 174 other women in Alberta, and no difference between both populations in women with diabetes  
8  
9 175 during pregnancy. In our study, labour induction rates were higher in First Nations women than  
10  
11 176 among other women, especially for those with pre-existing diabetes and GDM. Oster et al. (17)  
12  
13 177 did not find higher rates of labour induction if First Nations women, independently of diabetes  
14  
15 178 status, compared to the other populations. Our finding that among women with pre-existing  
16  
17 179 diabetes and GDM, First Nations women had a higher rate of caesarean deliveries compared to  
18  
19 180 other women, also diverges from Oster et al. (17) who reported lower caesarean rates in First  
20  
21 181 Nations women independent of diabetes status. Differences in the health of First Nations women  
22  
23 182 from Ontario and Alberta, as well as in access to health care, could explain the differences between  
24  
25 183 our study and Oster et al. (17)  
26  
27  
28  
29  
30

31 184 In terms of perinatal outcomes, First Nations women with diabetes had similar rates of preterm  
32  
33 185 birth compared to other women in Ontario. This finding differs from data reported by Liu et al. in  
34  
35 186 Ontario, (16) and Chen et al. in Quebec, (18), who both found a higher rate of preterm birth in  
36  
37 187 First Nations women with diabetes. Contrary to Liu et al. (27) we did not distinguish First Nations  
38  
39 188 women living in or outside of First Nations communities in our study, however, the majority of  
40  
41 189 First Nations women in Ontario live outside of First Nations communities, which could explain  
42  
43 190 the difference between both studies. Differences between First Nations populations in Ontario  
44  
45 191 versus Quebec, as well as in health services access/utilization could explain the divergence  
46  
47 192 between our finding and those of Chen et al. (18) First Nations offspring were more likely to be  
48  
49 193 LGA compared to the other population, as reported by Oster et al. in Alberta, (17) and Chen et al.  
50  
51 194 in Quebec. (18) LGA is associated with worse glycemc control during pregnancy, so this  
52  
53  
54  
55  
56  
57  
58  
59  
60

1  
2  
3 195 observation may reflect that First Nations women with pre-existing diabetes or GDM may not be  
4  
5 196 achieving as good glycemic control in pregnancy as other women. Nevertheless, despite of higher  
6  
7 197 rates of LGA babies, we did not find differences in obstructed labor rates between First Nations  
8  
9  
10 198 women and other women, a finding that deserves further studies. First Nations women with pre-  
11  
12 199 existing diabetes, had a higher rate of congenital anomalies compared to the other population, as  
13  
14 200 reported by Oster et al., in Alberta. (17) and Chen et al. in Quebec. (18) In our study, even First  
15  
16 201 Nations women with GDM had an increased risk of congenital anomalies than the other  
17  
18 202 population. It is usually thought that GDM does not increased the risk for anomalies since the  
19  
20 203 glucose intolerance occurs after organogenesis has finished. This finding suggests there may be a  
21  
22 204 burden of undiagnosed type 2 diabetes among those First Nations women labelled as GDM,  
23  
24 205 supporting the need of greater screening for type 2 diabetes in First Nations women of reproductive  
25  
26 206 age. Stillbirth rates were higher in First Nations women compared to other women, as reported by  
27  
28 207 others. (10, 18, 28, 29) The gap was greater in women with pre-existing diabetes, a known risk  
29  
30 208 factor for stillbirths.  
31  
32  
33  
34  
35

36 209 With regard to health services access/utilization, almost all First Nations women, independent of  
37  
38 210 diabetes status, were seen by a primary care provider during pregnancy. While almost 100% of  
39  
40 211 non-First Nations women with pre-existing diabetes and GDM consulted an obstetrician or  
41  
42 212 gynecologist during pregnancy, the rate was about 85% in First Nations women, higher than what  
43  
44 213 was previously reported in on-reserve First Nations women in Ontario (64%). (16) First Nations  
45  
46 214 women with pre-existing diabetes had less access to specialized care (internal medicine, or  
47  
48 215 endocrinology) during pregnancy compared to other women, as reported by others, (16) which  
49  
50 216 may contribute to worse glycemic control in First Nations women with diabetes and therefore  
51  
52 217 adverse maternal and offspring outcomes. In women with pre-existing diabetes, there was no  
53  
54  
55  
56  
57  
58  
59  
60

1  
2  
3 218 difference in consults to ophthalmology or optometrist between First Nations women and other  
4  
5 219 women in Ontario; however, only about 15% of women visited these specialist during pregnancy,  
6  
7  
8 220 a very low proportion considering that current guidelines recommend evaluation by an  
9  
10 221 ophthalmologist in all pregnant women with pre-existing diabetes. (30) While the reasons for this  
11  
12 222 disparity in access to care are not addressed in our study, others have identified a number of  
13  
14 223 important factors including rurality and geographic isolation, culturally unsafe care and poor health  
15  
16 224 care experiences, a lack of a holistic approach to care, significant power imbalances within the  
17  
18 225 patient-provider relationship, and a lack of understanding from health care providers, among  
19  
20 226 others. (14, 24)  
21  
22  
23  
24

### 25 227 **Limitations**

26 228 Our study has some limitations. First, women with pre-existing diabetes may have been  
27  
28 229 misclassified as having GDM due to incomplete capture of such cases by the Ontario Diabetes  
29  
30 230 Database. In addition, the Ontario Diabetes Database (ODD) algorithm does not distinguish  
31  
32 231 between type 1 or type 2 diabetes. However, First Nations women with pre-existing diabetes likely  
33  
34 232 have a much greater proportion of type 2 diabetes than in the other population, and this may be  
35  
36 233 driving some of the difference in adverse outcomes between First Nations women and the other  
37  
38 234 population with pre-existing diabetes. Second, due to low numbers for some of the outcomes  
39  
40 235 studied, we were not able to analyse our data based on rurality or location of residence being in or  
41  
42 236 outside of a First Nations community. Also, some women, especially in northwestern Ontario, may  
43  
44 237 have receive their pregnancy care in Winnipeg, so their health service utilization will be  
45  
46 238 underestimated.  
47  
48  
49  
50

### 51 239 **Conclusion**

52  
53  
54  
55  
56  
57  
58  
59  
60

1  
2  
3 240 Our results confirm disparities in maternal and perinatal outcomes between First Nations women  
4  
5 241 and other women in Ontario. While health services access/utilization at the primary care level  
6  
7 242 seems adequate, access to specialized care especially for women with pre-existing diabetes needs  
8  
9 243 to improve. In light of recent national inquiries into the treatment of Indigenous women in Canada  
10  
11 244 (11, 12), it is important that efforts to improve the quality of care and maternal and neonatal  
12  
13 245 outcomes in First Nations women with diabetes acknowledge the agency of First Nations women  
14  
15 246 and be grounded in an understanding of ongoing, intergenerational impacts of colonization.  
16  
17  
18  
19

## 20 247 **Acknowledgements**

21  
22  
23 248 Our partner through the early design, implementation and final dissemination of this project is the  
24  
25 249 Chiefs of Ontario. Their many member contributions were key to the content and quality of the  
26  
27 250 project. The authors also acknowledge the members of the Patient Advisory Committee for  
28  
29 251 providing insightful and thoughtful input; their advice made a significant contribution in shaping  
30  
31 252 the work. For a complete listing of the specific members of the Committee, see (31). We also wish  
32  
33 253 to acknowledge the First Nations individuals from Big Grassy River, Alderville First Nation,  
34  
35 254 Caldwell First Nation, Six Nations of the Grand River and Moose Cree First Nation living with  
36  
37 255 diabetes who shared their personal experiences. The authors would also like to thank Katherine  
38  
39 256 Lajkosz for her contribution.  
40  
41  
42  
43  
44

45 257 Parts of this material are based on data and information compiled and provided by: MOHLTC,  
46  
47 258 Cancer Care Ontario, and the Canadian Institute of Health Information. The analyses, conclusions,  
48  
49 259 opinions and statements expressed herein are solely those of the authors and do not reflect those  
50  
51 260 of the funding or data sources; no endorsement is intended or should be inferred.  
52  
53  
54  
55  
56  
57  
58  
59  
60

1  
2  
3 261 **References**  
4

- 5 262 1. Feig DS, Razzaq A, Sykora K, Hux JE, Anderson GM. Trends in deliveries, prenatal care, and  
6 263 obstetrical complications in women with pregestational diabetes: a population-based study in Ontario,  
7 264 Canada, 1996-2001. *Diabetes Care*. 2006;29(2):232-5.  
8 265 2. Metcalfe A, Sabr Y, Hutcheon JA, Donovan L, Lyons J, Burrows J, et al. Trends in Obstetric  
9 266 Intervention and Pregnancy Outcomes of Canadian Women With Diabetes in Pregnancy From 2004 to  
10 267 2015. *J Endocr Soc*. 2017;1(12):1540-9.  
11 268 3. Dyck R, Osgood N, Lin TH, Gao A, Stang MR. Epidemiology of diabetes mellitus among First  
12 269 Nations and non-First Nations adults. *CMAJ*. 2010;182(3):249-56.  
13 270 4. Osgood ND, Dyck RF, Grassmann WK. The inter- and intragenerational impact of gestational  
14 271 diabetes on the epidemic of type 2 diabetes. *Am J Public Health*. 2011;101(1):173-9.  
15 272 5. Young TK, Reading J, Elias B, O'Neil JD. Type 2 diabetes mellitus in Canada's first nations: status  
16 273 of an epidemic in progress. *CMAJ*. 2000;163(5):561-6.  
17 274 6. Walker J, Slater M, Jones C, Shah B, Frymire E, Khan S, Jacklin K, Green M. Diabetes prevalence  
18 275 and incidence in First Nations people in Ontario, 1995-2014: A longitudinal cohort study using linked  
19 276 administrative data. *CMAJ*. Submitted 2019-07-02.  
20 277 7. Luo ZC, Wilkins R, Platt RW, Kramer MS, Fetal, Infant Health Study Group of the Canadian  
21 278 Perinatal Surveillance S. Risks of adverse pregnancy outcomes among Inuit and North American Indian  
22 279 women in Quebec, 1985-97. *Paediatr Perinat Epidemiol*. 2004;18(1):40-50.  
23 280 8. Chen L, Xiao L, Auger N, Torrie J, McHugh NG, Zoungrana H, et al. Disparities and Trends in Birth  
24 281 Outcomes, Perinatal and Infant Mortality in Aboriginal vs. Non-Aboriginal Populations: A Population-  
25 282 Based Study in Quebec, Canada 1996-2010. *PLoS One*. 2015;10(9):e0138562.  
26 283 9. Luo ZC, Wilkins R, Heaman M, Smylie J, Martens PJ, McHugh NG, et al. Birth outcomes and infant  
27 284 mortality among First Nations Inuit, and non-Indigenous women by northern versus southern residence,  
28 285 Quebec. *J Epidemiol Community Health*. 2012;66(4):328-33.  
29 286 10. Auger N, Park AL, Zoungrana H, McHugh NG, Luo ZC. Rates of stillbirth by gestational age and  
30 287 cause in Inuit and First Nations populations in Quebec. *CMAJ*. 2013;185(6):E256-62.  
31 288 11. Truth and Reconciliation Commission of Canada., Truth and Reconciliation Commission of  
32 289 Canada. Final report of the Truth and Reconciliation Commission of Canada. Volume one, Summary :  
33 290 honouring the truth, reconciling for the future. Second printing . ed. Toronto: James Lorimer & Company  
34 291 Ltd., Publishers; 2015. vi, 536 pages p.  
35 292 12. National Inquiry into Missing and Murdered Indigenous Women and Girls. Reclaiming power  
36 293 and place : the final report of the National Inquiry into Missing and Murdered Indigenous Women and  
37 294 Girls. Gatineau: National Inquiry into Missing and Murdered Indigenous Women and Girls; 2019. 2  
38 295 volumes p.  
39 296 13. Allan, B. & Smylie, J. (2015). First Peoples, second class treatment: The role of racism in the  
40 297 health and well-being of Indigenous peoples in Canada. Toronto, ON: the Wellesley Institute.  
41 298 14. Jacklin KM, Henderson RI, Green ME, Walker LM, Calam B, Crowshoe LJ. Health care experiences  
42 299 of Indigenous people living with type 2 diabetes in Canada. *CMAJ*. 2017;189(3):E106-E12.  
43 300 15. Aljohani N, Rempel BM, Ludwig S, Morris M, McQuillen K, Cheang M, et al. Gestational diabetes  
44 301 in Manitoba during a twenty-year period. *Clin Invest Med*. 2008;31(3):E131-7.  
45 302 16. Liu SL, Shah BR, Naqshbandi M, Tran V, Harris SB. Increased rates of adverse outcomes for  
46 303 gestational diabetes and pre-pregnancy diabetes in on-reserve First Nations Women in Ontario, Canada.  
47 304 *Diabet Med*. 2012;29(8):e180-3.  
48 305 17. Oster RT, King M, Morrish DW, Mayan MJ, Toth EL. Diabetes in pregnancy among First Nations  
49 306 women in Alberta, Canada: a retrospective analysis. *BMC Pregnancy Childbirth*. 2014;14:136.

- 1  
2  
3 307 18. Chen L, Wang WJ, Auger N, Xiao L, Torrie J, McHugh NG, et al. Diabetes in pregnancy in  
4 308 associations with perinatal and postneonatal mortality in First Nations and non-Indigenous populations  
5 309 in Quebec, Canada: population-based linked birth cohort study. *BMJ Open*. 2019;9(4):e025084.  
6 310 19. Slater M et al. Reducing the burden of diabetes in First Nations people in Ontario: methods for a  
7 311 longitudinal population-based cohort study. *CMAJ Open* 2019. Submitted 2019-06-20.  
8 312 20. Ray JG, Urquia ML, Berger H, Vermeulen MJ. Maternal and neonatal separation and mortality  
9 313 associated with concurrent admissions to intensive care units. *CMAJ*. 2012;184(18):E956-62.  
10 314 21. Justice Laws. Indian Act, Revised Statutes of Canada [Internet]. 1985. Available from:  
11 315 <https://laws-lois.justice.gc.ca/eng/acts/i-5/fulltext.html>.  
12 316 22. Booth GL, Luo J, Park AL, Feig DS, Moineddin R, Ray JG. Influence of environmental temperature  
13 317 on risk of gestational diabetes. *CMAJ*. 2017;189(19):E682-E9.  
14 318 23. Kramer MS, Platt RW, Wen SW, Joseph KS, Allen A, Abrahamowicz M, et al. A new and improved  
15 319 population-based Canadian reference for birth weight for gestational age. *Pediatrics*. 2001;108(2):E35.  
16 320 24. Oster RT, Mayan MJ, Toth EL. Diabetes in pregnancy among First Nations women. *Qual Health*  
17 321 *Res*. 2014;24(11):1469-80.  
18 322 25. Ma RCW, Popkin BM. Intergenerational diabetes and obesity-A cycle to break? *PLoS Med*.  
19 323 2017;14(10):e1002415.  
20 324 26. Shulman R, Slater M, Khan S, Jones C, Walker J, Jacklin K, Green M, Frymire E, Shah B.  
21 325 Prevalence, incidence, and outcomes of diabetes in Ontario First Nations children: a longitudinal  
22 326 population-based cohort study. *CMAJ*. Submitted 2019-08-21.  
23 327 27. Statistics Canada. Aboriginal Peoples in Canada in 2006: Inuit, Me'tis, and First Nations, 2006  
24 328 Census. Statistics Canada Catalogue no. 97558XIE2006001. January 15. Analysis Series, 2006 Census.  
25 329 Ottawa: Statistics Canada, 2008.  
26 330 28. Macintosh MC, Fleming KM, Bailey JA, Doyle P, Modder J, Acolet D, et al. Perinatal mortality and  
27 331 congenital anomalies in babies of women with type 1 or type 2 diabetes in England, Wales, and  
28 332 Northern Ireland: population based study. *BMJ*. 2006;333(7560):177.  
29 333 29. Oster RT, Toth EL. A retrospective analysis of stillbirth epidemiology and risk factors among First  
30 334 Nations and non-First Nations pregnancies in Alberta from 2000 to 2009. *J Obstet Gynaecol Can*.  
31 335 2015;37(2):117-21.  
32 336 30. Wong TY, Sun J, Kawasaki R, Ruamviboonsuk P, Gupta N, Lansingh VC, et al. Guidelines on  
33 337 Diabetic Eye Care: The International Council of Ophthalmology Recommendations for Screening, Follow-  
34 338 up, Referral, and Treatment Based on Resource Settings. *Ophthalmology*. 2018;125(10):1608-22.  
35 339 31. Green ME, Jones C, Walker JD, Shah BR, Jacklin K, Slater M, et al. First Nations and Diabetes in  
36 340 Ontario. Toronto, ON: ICES; 2019.  
37  
38  
39  
40  
41  
42  
43  
44  
45  
46  
47  
48  
49  
50  
51  
52  
53  
54  
55  
56  
57  
58  
59  
60

Table 1: Temporal trend in diabetes during pregnancy among First Nations women compared to the other population. 2002-2014. Rates are age-standardized per 1000 women

|                                      | 2002                  | 2003                   | 2004                   | 2005                   | 2006                  | 2007                   | 2008                  | 2009                   | 2010                   | 2011                   | 2012                   | 2013                   | 2014                    | P for trend |
|--------------------------------------|-----------------------|------------------------|------------------------|------------------------|-----------------------|------------------------|-----------------------|------------------------|------------------------|------------------------|------------------------|------------------------|-------------------------|-------------|
| <b>Pre-existing Diabetes</b>         |                       |                        |                        |                        |                       |                        |                       |                        |                        |                        |                        |                        |                         |             |
| <b>Other Population</b>              | 13.9<br>(13.2 - 14.5) | 14.9<br>(14.2 - 15.6)  | 16.3<br>(15.6 - 17.0)  | 15.6<br>(15.0 - 16.3)  | 17.9<br>(17.2 - 18.7) | 18.4<br>(17.7 - 19.1)  | 19.1<br>(18.4 - 19.9) | 19.4<br>(18.6 - 20.1)  | 19.0<br>(18.3 - 19.8)  | 20.0<br>(19.2 - 20.7)  | 20.4<br>(19.6 - 21.2)  | 20.3<br>(19.6 - 21.1)  | 20.5<br>(19.8 - 21.3)   | <.0001      |
| <b>First Nations</b>                 | 52.3<br>(39.6 - 67.9) | 51.9<br>(39.5 - 66.9)  | 45.4<br>(34.1 - 59.4)  | 57.8<br>(44.7 - 73.5)  | 48.3<br>(36.8 - 62.2) | 47.1<br>(36.2 - 60.2)  | 46.7<br>(35.8 - 59.8) | 47.9<br>(36.7 - 61.6)  | 44.0<br>(33.4 - 56.9)  | 56.3<br>(44.6 - 70.2)  | 59.5<br>(47.3 - 73.8)  | 49.8<br>(38.8 - 62.8)  | 40.7<br>(31.1 - 52.2)   | 0.6549      |
| <b>Rate Ratio (95% CI)*</b>          | 3.8 (2.9 - 4.9)       | 3.5 (2.7 - 4.5)        | 2.8 (2.1 - 3.7)        | 3.7 (2.9 - 4.7)        | 2.7 (2.1 - 3.5)       | 2.6 (2.0 - 3.3)        | 2.4 (1.9 - 3.1)       | 2.5 (1.9 - 3.2)        | 2.3 (1.8 - 3.0)        | 2.8 (2.3 - 3.5)        | 2.9 (2.3 - 3.6)        | 2.4 (1.9 - 3.1)        | 2.0 (1.5 - 2.6)         |             |
| <b>Gestational Diabetes Mellitus</b> |                       |                        |                        |                        |                       |                        |                       |                        |                        |                        |                        |                        |                         |             |
| <b>Other Population</b>              | 36.6<br>(35.5 - 37.7) | 36.1<br>(35.1 - 37.2)  | 42.3<br>(41.2 - 43.5)  | 43.5<br>(42.3 - 44.6)  | 47.2<br>(46.0 - 48.4) | 46.1<br>(45.0 - 47.3)  | 51.1<br>(49.9 - 52.3) | 54.2<br>(53.0 - 55.5)  | 52.3<br>(51.0 - 53.5)  | 52.3<br>(51.1 - 53.5)  | 55.1<br>(53.8 - 56.4)  | 55.6<br>(54.4 - 56.9)  | 60.7<br>(59.4 - 62.0)   | <.0001      |
| <b>First Nations</b>                 | 80.8<br>(65.3 - 99.0) | 83.8<br>(67.7 - 102.4) | 83.9<br>(68.3 - 102.0) | 92.1<br>(75.9 - 110.8) | 76.2<br>(61.4 - 93.5) | 87.7<br>(73.0 - 104.6) | 68.9<br>(55.8 - 84.2) | 84.7<br>(70.0 - 101.6) | 85.9<br>(71.2 - 102.7) | 85.0<br>(70.5 - 101.6) | 93.2<br>(78.5 - 109.8) | 85.0<br>(70.9 - 101.0) | 108.9<br>(93.3 - 126.2) | 0.0034      |
| <b>Rate Ratio (95% CI)*</b>          | 2.2 (1.8 - 2.7)       | 2.3 (1.9 - 2.8)        | 2.0 (1.6 - 2.4)        | 2.1 (1.8 - 2.6)        | 1.6 (1.3 - 2.0)       | 1.9 (1.6 - 2.3)        | 1.3 (1.1 - 1.7)       | 1.6 (1.3 - 1.9)        | 1.6 (1.4 - 2.0)        | 1.6 (1.4 - 2.0)        | 1.7 (1.4 - 2.0)        | 1.5 (1.3 - 1.8)        | 1.8 (1.5 - 2.1)         |             |

\* Rate Ratio First Nations compared to other Population

Table 2. Diabetes during pregnancy and Maternal/Labour outcomes in First Nations women and other women in Ontario

| Maternal/Labour Outcomes        | No Diabetes Mellitus  |                       |                       |                       |                       |                       | Pre-existing Diabetes |                       |                       |                       |                       |                       | Gestational Diabetes Mellitus |                       |                       |                       |                       |                       |
|---------------------------------|-----------------------|-----------------------|-----------------------|-----------------------|-----------------------|-----------------------|-----------------------|-----------------------|-----------------------|-----------------------|-----------------------|-----------------------|-------------------------------|-----------------------|-----------------------|-----------------------|-----------------------|-----------------------|
|                                 | Other Women           |                       |                       | First Nations Women   |                       |                       | Other Women           |                       |                       | First Nations Women   |                       |                       | Other Women                   |                       |                       | First Nations Women   |                       |                       |
|                                 | 2002-2005             | 2006-2009             | 2010-2014             | 2002-2005             | 2006-2009             | 2010-2014             | 2002-2005             | 2006-2009             | 2010-2014             | 2002-2005             | 2006-2009             | 2010-2014             | 2002-2005                     | 2006-2009             | 2010-2014             | 2002-2005             | 2006-2009             | 2010-2014             |
| <b>Preeclampsia</b>             |                       |                       |                       |                       |                       |                       |                       |                       |                       |                       |                       |                       |                               |                       |                       |                       |                       |                       |
| Rate per 100 deliveries (95%CI) | 1.1<br>(1.1 - 1.1)    | 1.0<br>(1.0 - 1.1)    | 1.3<br>(1.2 - 1.3)    | 1.4<br>(1.1 - 1.8)    | 1.3<br>(1.0 - 1.7)    | 1.7<br>(1.4 - 2.1)    | 3.1<br>(2.6 - 3.7)    | 2.8<br>(2.4 - 3.3)    | 3.7<br>(3.3 - 4.3)    | 5.6<br>(3.2 - 9.1)    | 4.9<br>(2.7 - 8.1)    | 3.2<br>(1.8 - 5.4)    | 1.9<br>(1.7 - 2.1)            | 1.6<br>(1.4 - 1.8)    | 2.1<br>(1.9 - 2.3)    | 3.2<br>(1.8 - 5.2)    | 4.7<br>(3.0 - 7.1)    | 4.4<br>(3.1 - 6.1)    |
| RR (95%CI)                      |                       |                       |                       | 1.32<br>(1.04 - 1.66) | 1.29<br>(1.01 - 1.65) | 1.36<br>(1.13 - 1.63) |                       |                       |                       | 1.80<br>(1.07 - 3.03) | 1.73<br>(1.01 - 2.95) | 0.86<br>(0.50 - 1.48) |                               |                       |                       | 1.66<br>(1.00 - 2.77) | 2.96<br>(1.93 - 4.55) | 2.09<br>(1.49 - 2.93) |
| P for trend 2002-2014           | <.0001                |                       |                       | 0.2214                |                       |                       |                       |                       | 0.0002                | 0.1922                |                       |                       | <.0001                        |                       |                       | 0.2548                |                       |                       |
| <b>Labour induction</b>         |                       |                       |                       |                       |                       |                       |                       |                       |                       |                       |                       |                       |                               |                       |                       |                       |                       |                       |
| Rate per 100 deliveries (95%CI) | 20.6<br>(20.5 - 20.7) | 20.8<br>(20.6 - 20.9) | 24.1<br>(23.9 - 24.2) | 22.5<br>(21.1 - 23.9) | 23.7<br>(22.4 - 25.0) | 26.4<br>(25.2 - 27.7) | 28.6<br>(27.2 - 30.1) | 30.7<br>(29.4 - 32.0) | 35.1<br>(33.8 - 36.4) | 33.4<br>(27.1 - 40.8) | 40.1<br>(33.2 - 48.0) | 42.9<br>(36.7 - 49.9) | 30.0<br>(29.1 - 30.9)         | 30.7<br>(29.9 - 31.5) | 37.5<br>(36.7 - 38.3) | 38.5(3.2 - 44.4)      | 42.4<br>(36.9 - 48.6) | 46.9<br>(42.3 - 51.8) |
| RR (95%CI)                      |                       |                       |                       | 1.09<br>(1.03 - 1.16) | 1.14<br>(1.08 - 1.21) | 1.10<br>(1.05 - 1.15) |                       |                       |                       | 1.17<br>(0.95 - 1.43) | 1.31<br>(1.08 - 1.57) | 1.22<br>(1.05 - 1.43) |                               |                       |                       | 1.28<br>(1.11 - 1.49) | 1.38<br>(1.20 - 1.59) | 1.25<br>(1.13 - 1.38) |
| P for trend 2002-2014           | <.0001                |                       |                       | <.0001                |                       |                       |                       |                       | <.0001                | 0.0481                |                       |                       | <.0001                        |                       |                       | 0.0013                |                       |                       |
| <b>Obstructed Labour</b>        |                       |                       |                       |                       |                       |                       |                       |                       |                       |                       |                       |                       |                               |                       |                       |                       |                       |                       |
| Rate per 100 deliveries (95%CI) | 5.7<br>(5.6 - 5.7)    | 6.2<br>(6.1 - 6.3)    | 6.2<br>(6.1 - 6.3)    | 4.6<br>(4.0 - 5.3)    | 5.5<br>(4.9 - 6.2)    | 5.3<br>(4.8 - 5.9)    | 5.8<br>(5.2 - 6.4)    | 6.4<br>(5.8 - 7.1)    | 6.3<br>(5.8 - 6.9)    | 3.6<br>(1.8 - 6.4)    | 6.2<br>(3.7 - 9.8)    | 3.7<br>(2.1 - 6.2)    | 5.8<br>(5.4 - 6.2)            | 6.5<br>(6.1 - 6.8)    | 6.6<br>(6.2 - 6.9)    | 4.6<br>(2.9 - 6.9)    | 5.8<br>(3.9 - 8.3)    | 5.5<br>(4.1 - 7.4)    |
| RR (95%CI)                      |                       |                       |                       | 0.81<br>(0.71 - 0.93) | 0.89<br>(0.79 - 1.00) | 0.86<br>(0.78 - 0.95) |                       |                       |                       | 0.62<br>(0.34 - 1.13) | 0.97<br>(0.61 - 1.54) | 0.59<br>(0.35 - 1.00) |                               |                       |                       | 0.79<br>(0.52 - 1.21) | 0.90<br>(0.63 - 1.30) | 0.84<br>(0.63 - 1.13) |
| P for trend 2002-2014           | <.0001                |                       |                       | 0.027                 |                       |                       |                       |                       | 0.5034                | 0.6858                |                       |                       | 0.0004                        |                       |                       | 0.3899                |                       |                       |
| <b>Caesarean delivery</b>       |                       |                       |                       |                       |                       |                       |                       |                       |                       |                       |                       |                       |                               |                       |                       |                       |                       |                       |
| Rate per 100 deliveries (95%CI) | 26.5<br>(26.4 - 26.7) | 28.3<br>(28.2 - 28.5) | 27.8<br>(27.7 - 27.9) | 27.4<br>(25.8 - 29.0) | 28.9<br>(27.4 - 30.4) | 28.5<br>(27.2 - 29.8) | 42.6<br>(41.0 - 44.3) | 44.2<br>(42.7 - 45.8) | 43.6<br>(42.3 - 45.0) | 53.7<br>(45.6 - 62.9) | 47.8<br>(40.2 - 56.5) | 53.1<br>(46.2 - 60.7) | 35.4<br>(34.5 - 36.3)         | 37.4<br>(36.6 - 38.2) | 36.4<br>(35.7 - 37.1) | 41.8<br>(36.2 - 48.1) | 41.4<br>(36.0 - 47.4) | 43.4<br>(38.9 - 48.3) |
| RR (95%CI)                      |                       |                       |                       | 1.03<br>(0.98 - 1.10) | 1.02<br>(0.97 - 1.07) | 1.02<br>(0.98 - 1.07) |                       |                       |                       | 1.26<br>(1.07 - 1.48) | 1.08<br>(0.91 - 1.28) | 1.22<br>(1.06 - 1.40) |                               |                       |                       | 1.18<br>(1.03 - 1.36) | 1.11<br>(0.97 - 1.27) | 1.19<br>(1.07 - 1.33) |
| P for trend 2002-2014           | <.0001                |                       |                       | 0.0094                |                       |                       |                       |                       | 0.0163                | 0.4941                |                       |                       | 0.1459                        |                       |                       | 0.6206                |                       |                       |



Table 3. Diabetes during pregnancy and Neonatal outcomes in First Nations women and other women in Ontario

| Neonatal Outcomes            | No Diabetes Mellitus  |                       |                    |                       |                       |                       | Pre-existing Diabetes |                       |                       |                       |                       |                       | Gestational Diabetes Mellitus |                       |                       |                       |                       |                       |
|------------------------------|-----------------------|-----------------------|--------------------|-----------------------|-----------------------|-----------------------|-----------------------|-----------------------|-----------------------|-----------------------|-----------------------|-----------------------|-------------------------------|-----------------------|-----------------------|-----------------------|-----------------------|-----------------------|
|                              | Other Women           |                       |                    | First Nations Women   |                       |                       | Other Women           |                       |                       | First Nations Women   |                       |                       | Other Women                   |                       |                       | First Nations Women   |                       |                       |
|                              | 2002-2005             | 2006-2009             | 2010-2014          | 2002-2005             | 2006-2009             | 2010-2014             | 2002-2005             | 2006-2009             | 2010-2014             | 2002-2005             | 2006-2009             | 2010-2014             | 2002-2005                     | 2006-2009             | 2010-2014             | 2002-2005             | 2006-2009             | 2010-2014             |
| <b>Preterm delivery</b>      |                       |                       |                    |                       |                       |                       |                       |                       |                       |                       |                       |                       |                               |                       |                       |                       |                       |                       |
| Rates per 100 births (95%CI) | 7.5<br>(7.4 - 7.6)    | 7.8<br>(7.7 - 7.9)    | 7.5<br>(7.4 - 7.6) | 7.7<br>(6.9 - 8.6)    | 8.5<br>(7.7 - 9.4)    | 8.8<br>(8.0 - 9.5)    | 17.5<br>(16.2 - 18.8) | 16.9<br>(15.9 - 17.9) | 16.9<br>(16.0 - 17.8) | 20.5<br>(15.5 - 26.5) | 19.8<br>(15.0 - 25.8) | 19.0<br>(15.0 - 23.7) | 12.1<br>(11.5 - 12.6)         | 12.1<br>(11.6 - 12.5) | 11.8<br>(11.4 - 12.3) | 11.9<br>(9.0 - 15.5)  | 11.8<br>(8.9 - 15.3)  | 14.4<br>(11.8 - 17.3) |
| RR (95% CI)                  |                       |                       |                    | 1.03<br>(0.92 - 1.14) | 1.10<br>(0.99 - 1.21) | 1.17<br>(1.07 - 1.27) |                       |                       |                       | 1.17<br>(0.90 - 1.54) | 1.18<br>(0.90 - 1.54) | 1.12<br>(0.89 - 1.41) |                               |                       |                       | 0.99<br>(0.76 - 1.29) | 0.98<br>(0.75 - 1.27) | 1.21<br>(1.00 - 1.47) |
| P for trend 2002-2014        | 0.9417                |                       |                    | 0.0151                |                       |                       | 0.6404                |                       |                       | 0.4751                |                       |                       | 0.6158                        |                       |                       | 0.1198                |                       |                       |
| <b>Large Gestation Age</b>   |                       |                       |                    |                       |                       |                       |                       |                       |                       |                       |                       |                       |                               |                       |                       |                       |                       |                       |
| Rates per 100 births (95%CI) | 11.0<br>(10.9 - 11.1) | 10.2<br>(10.1 - 10.3) | 9.5<br>(9.4 - 9.6) | 24.2<br>(22.7 - 25.8) | 23.7<br>(22.3 - 25.1) | 21.2<br>(20.0 - 22.3) | 25.3<br>(23.9 - 26.8) | 24.4<br>(23.2 - 25.7) | 24.3<br>(23.1 - 25.4) | 50.7<br>(42.4 - 60.0) | 50.9<br>(42.7 - 60.3) | 46.1<br>(39.5 - 53.4) | 16.3<br>(15.6 - 17.0)         | 15.0<br>(14.4 - 15.6) | 14.0<br>(13.5 - 14.5) | 49.4<br>(43.2 - 56.3) | 50.1<br>(43.9 - 56.9) | 45.9<br>(41.2 - 51.1) |
| RR (95% CI)                  |                       |                       |                    | 2.21<br>(2.08 - 2.35) | 2.31<br>(2.18 - 2.45) | 2.23<br>(2.11 - 2.36) |                       |                       |                       | 2.00<br>(1.67 - 2.40) | 2.09<br>(1.75 - 2.49) | 1.90<br>(1.63 - 2.22) |                               |                       |                       | 3.03<br>(2.65 - 3.48) | 3.34<br>(2.92 - 3.82) | 3.27<br>(2.93 - 3.66) |
| P for trend 2002-2014        | <.0001                |                       |                    | <.0001                |                       |                       | 0.0064                |                       |                       | 0.3482                |                       |                       | <.0001                        |                       |                       | 0.1264                |                       |                       |
| <b>Congenital Anomalies</b>  |                       |                       |                    |                       |                       |                       |                       |                       |                       |                       |                       |                       |                               |                       |                       |                       |                       |                       |
| Rates per 100 births (95%CI) | 5.1<br>(5.0 - 5.2)    | 4.8<br>(4.7 - 4.8)    | 5.6<br>(5.5 - 5.6) | 5.4<br>(4.7 - 6.1)    | 4.7<br>(4.1 - 5.4)    | 5.2<br>(4.7 - 5.8)    | 7.6<br>(6.9 - 8.4)    | 8.2<br>(7.5 - 9.0)    | 8.9<br>(8.2 - 9.6)    | 16.8<br>(12.3 - 22.4) | 14.2<br>(10.1 - 19.3) | 14.4<br>(10.8 - 18.7) | 5.7<br>(5.3 - 6.1)            | 5.3<br>(5.0 - 5.6)    | 6.0<br>(5.7 - 6.3)    | 8.0<br>(5.7 - 11.0)   | 5.4<br>(3.5 - 8.0)    | 8.0<br>(6.2 - 10.3)   |
| RR (95% CI)                  |                       |                       |                    | 1.05<br>(0.92 - 1.19) | 0.99<br>(0.87 - 1.13) | 0.94<br>(0.85 - 1.05) |                       |                       |                       | 2.20<br>(1.62 - 2.99) | 1.73<br>(1.25 - 2.39) | 1.62<br>(1.23 - 2.13) |                               |                       |                       | 1.40<br>(1.02 - 1.93) | 1.03<br>(0.70 - 1.53) | 1.34<br>(1.04 - 1.72) |
| P for trend 2002-2014        | <.0001                |                       |                    | 0.5652                |                       |                       | 0.0013                |                       |                       | 0.278                 |                       |                       | 0.0009                        |                       |                       | 0.8487                |                       |                       |
| <b>Stillbirths</b>           |                       |                       |                    |                       |                       |                       |                       |                       |                       |                       |                       |                       |                               |                       |                       |                       |                       |                       |
| Rates per 100 births (95%CI) | 0.6<br>(0.6 - 0.7)    | 0.6<br>(0.5 - 0.6)    | 0.5<br>(0.5 - 0.6) | 0.8<br>(0.6 - 1.2)    | 0.8<br>(0.6 - 1.2)    | 0.9<br>(0.7 - 1.2)    | 1.4<br>(1.1 - 1.8)    | 1.3<br>(1.1 - 1.7)    | 1.2<br>(1.0 - 1.5)    | 3.1<br>(1.4 - 5.8)    | 5.1<br>(2.9 - 8.4)    | 1.1<br>(0.4 - 2.6)    | 0.5<br>(0.4 - 0.6)            | 0.5<br>(0.4 - 0.7)    | 0.4<br>(0.3 - 0.5)    | 1.1<br>(0.4 - 2.5)    | 1.6<br>(0.7 - 3.2)    | 1.0<br>(0.4 - 2.1)    |
| RR (95% CI)                  |                       |                       |                    | 1.34<br>(0.97 - 1.86) | 1.49<br>(1.08 - 2.05) | 1.66<br>(1.28 - 2.15) |                       |                       |                       | 2.19<br>(1.09 - 4.40) | 3.81<br>(2.21 - 6.56) | 0.92<br>(0.38 - 2.20) |                               |                       |                       | 2.13<br>(0.89 - 5.11) | 3.06<br>(1.49 - 6.25) | 2.64<br>(1.20 - 5.81) |
| P for trend 2002-2014        | <.0001                |                       |                    | 0.8247                |                       |                       | 0.4968                |                       |                       | 0.1669                |                       |                       | 0.005                         |                       |                       | 0.3483                |                       |                       |

Table 4. Diabetes during pregnancy and health services utilization in First Nations women and other women in Ontario

| Health Services                    | No Diabetes Mellitus |                     |                     |                     |                     |                     | Pre-existing Diabetes |                     |                     |                      |                      |                     | Gestational Diabetes Mellitus |                     |                     |                     |                     |                     |
|------------------------------------|----------------------|---------------------|---------------------|---------------------|---------------------|---------------------|-----------------------|---------------------|---------------------|----------------------|----------------------|---------------------|-------------------------------|---------------------|---------------------|---------------------|---------------------|---------------------|
|                                    | Other Women          |                     |                     | First Nations Women |                     |                     | Other Women           |                     |                     | First Nations Women  |                      |                     | Other Women                   |                     |                     | First Nations Women |                     |                     |
|                                    | 2002-2005            | 2006-2009           | 2010-2014           | 2002-2005           | 2006-2009           | 2010-2014           | 2002-2005             | 2006-2009           | 2010-2014           | 2002-2005            | 2006-2009            | 2010-2014           | 2002-2005                     | 2006-2009           | 2010-2014           | 2002-2005           | 2006-2009           | 2010-2014           |
| <b>Primary Care</b>                |                      |                     |                     |                     |                     |                     |                       |                     |                     |                      |                      |                     |                               |                     |                     |                     |                     |                     |
| Rate per 100 deliveries (95%CI)    | 95.0<br>(94.7-95.2)  | 95.3<br>(95.1-95.6) | 94.0<br>(93.8-94.3) | 89.1<br>(86.4-91.9) | 87.4<br>(84.9-89.9) | 82.7<br>(80.5-84.8) | 96.8<br>(94.3-99.5)   | 97.2<br>(94.9-99.5) | 96.5<br>(94.4-98.5) | 93.7<br>(82.8-105.6) | 91.0<br>(80.3-102.6) | 84.0<br>(75.2-93.5) | 97.4<br>(95.8-99.0)           | 97.7<br>(96.3-99.1) | 96.2<br>(95.0-97.5) | 89.6<br>(81.3-98.4) | 84.0<br>(76.2-92.3) | 79.2<br>(73.1-85.6) |
| RR (95%CI)                         |                      |                     |                     | 0.94<br>(0.91-0.97) | 0.92<br>(0.89-0.94) | 0.88<br>(0.86-0.90) |                       |                     |                     | 0.97<br>(0.86-1.09)  | 0.94<br>(0.83-1.06)  | 0.87<br>(0.78-0.97) |                               |                     |                     | 0.92<br>(0.84-1.01) | 0.86<br>(0.78-0.95) | 0.82<br>(0.76-0.89) |
| P for trend 2002-2014              | <.0001               |                     |                     | <.0001              |                     |                     |                       |                     | <.0001              | <.0001               |                      |                     | <.0001                        |                     |                     | <.0001              |                     |                     |
| <b>Obstetrics/Gynecology</b>       |                      |                     |                     |                     |                     |                     |                       |                     |                     |                      |                      |                     |                               |                     |                     |                     |                     |                     |
| Rate per 100 deliveries (95%CI)    | 85.6<br>(85.4-85.9)  | 88.2<br>(88.0-88.5) | 87.8<br>(87.6-88.1) | 69.1<br>(66.6-71.6) | 68.2<br>(65.9-70.5) | 67.1<br>(65.2-69.1) | 95.2<br>(92.7-97.7)   | 96.7<br>(94.5-99.0) | 97.2<br>(95.2-99.3) | 78.3<br>(68.5-89.3)  | 81.5<br>(71.4-92.6)  | 81.5<br>(72.9-90.8) | 94.7<br>(93.2-96.3)           | 97.0<br>(95.6-98.3) | 97.8<br>(96.5-99.1) | 76.4<br>(68.7-84.7) | 78.7<br>(71.2-86.9) | 81.6<br>(75.4-88.1) |
| RR (95%CI)                         |                      |                     |                     | 0.81<br>(0.78-0.84) | 0.77<br>(0.75-0.80) | 0.76<br>(0.74-0.79) |                       |                     |                     | 0.82<br>(0.72-0.94)  | 0.84<br>(0.74-0.96)  | 0.84<br>(0.75-0.94) |                               |                     |                     | 0.81<br>(0.73-0.89) | 0.81<br>(0.74-0.90) | 0.83<br>(0.77-0.90) |
| P for trend 2002-2014              | <.0001               |                     |                     | 0.2478              |                     |                     |                       |                     | <.0001              | 0.2605               |                      |                     | <.0001                        |                     |                     | 0.0405              |                     |                     |
| <b>Internist/Endocrinology</b>     |                      |                     |                     |                     |                     |                     |                       |                     |                     |                      |                      |                     |                               |                     |                     |                     |                     |                     |
| Rate per 100 deliveries (95%CI)    |                      |                     |                     |                     |                     |                     | 57.4<br>(55.5-59.5)   | 59.8<br>(58.0-61.6) | 60.1<br>(58.5-61.7) | 39.9<br>(33.0-47.9)  | 47.3<br>(39.7-56.0)  | 49.1<br>(42.5-56.4) | 68.9<br>(67.7-70.2)           | 72.8<br>(71.6-73.9) | 75.2<br>(74.2-76.3) | 32.1<br>(27.2-37.7) | 35.0<br>(29.9-40.7) | 38.3<br>(34.0-42.9) |
| RR (95%CI)                         |                      |                     |                     |                     |                     |                     |                       |                     |                     | 0.70<br>(0.58-0.84)  | 0.79<br>(0.67-0.94)  | 0.82<br>(0.71-0.94) |                               |                     |                     | 0.47<br>(0.40-0.55) | 0.48<br>(0.41-0.56) | 0.51<br>(0.45-0.57) |
| P for trend 2002-2014              |                      |                     |                     |                     |                     |                     |                       |                     | <.0001              | 0.0038               |                      |                     | <.0001                        |                     |                     | 0.0237              |                     |                     |
| <b>Ophthalmologist/optometrist</b> |                      |                     |                     |                     |                     |                     |                       |                     |                     |                      |                      |                     |                               |                     |                     |                     |                     |                     |
| Rate per 100 deliveries (95%CI)    |                      |                     |                     |                     |                     |                     | 17.5<br>(16.3-18.7)   | 12.9<br>(12.1-13.8) | 10.2<br>(9.6-10.9)  | 14.2<br>(10.2-19.3)  | 12.3<br>(8.6-17.1)   | 13.5<br>(10.2-17.7) |                               |                     |                     |                     |                     |                     |
| RR (95%CI)                         |                      |                     |                     |                     |                     |                     |                       |                     |                     | 0.81<br>(0.59-1.11)  | 0.95<br>(0.68-1.33)  | 1.32<br>(1.00-1.74) |                               |                     |                     |                     |                     |                     |
| P for trend 2002-2014              |                      |                     |                     |                     |                     |                     |                       |                     | <.0001              | 0.8226               |                      |                     |                               |                     |                     |                     |                     |                     |

Figure 1. Temporal trends in pre-existing (A) and gestational diabetes (B) during pregnancy among First Nations women and other women in Ontario, 2002-2014

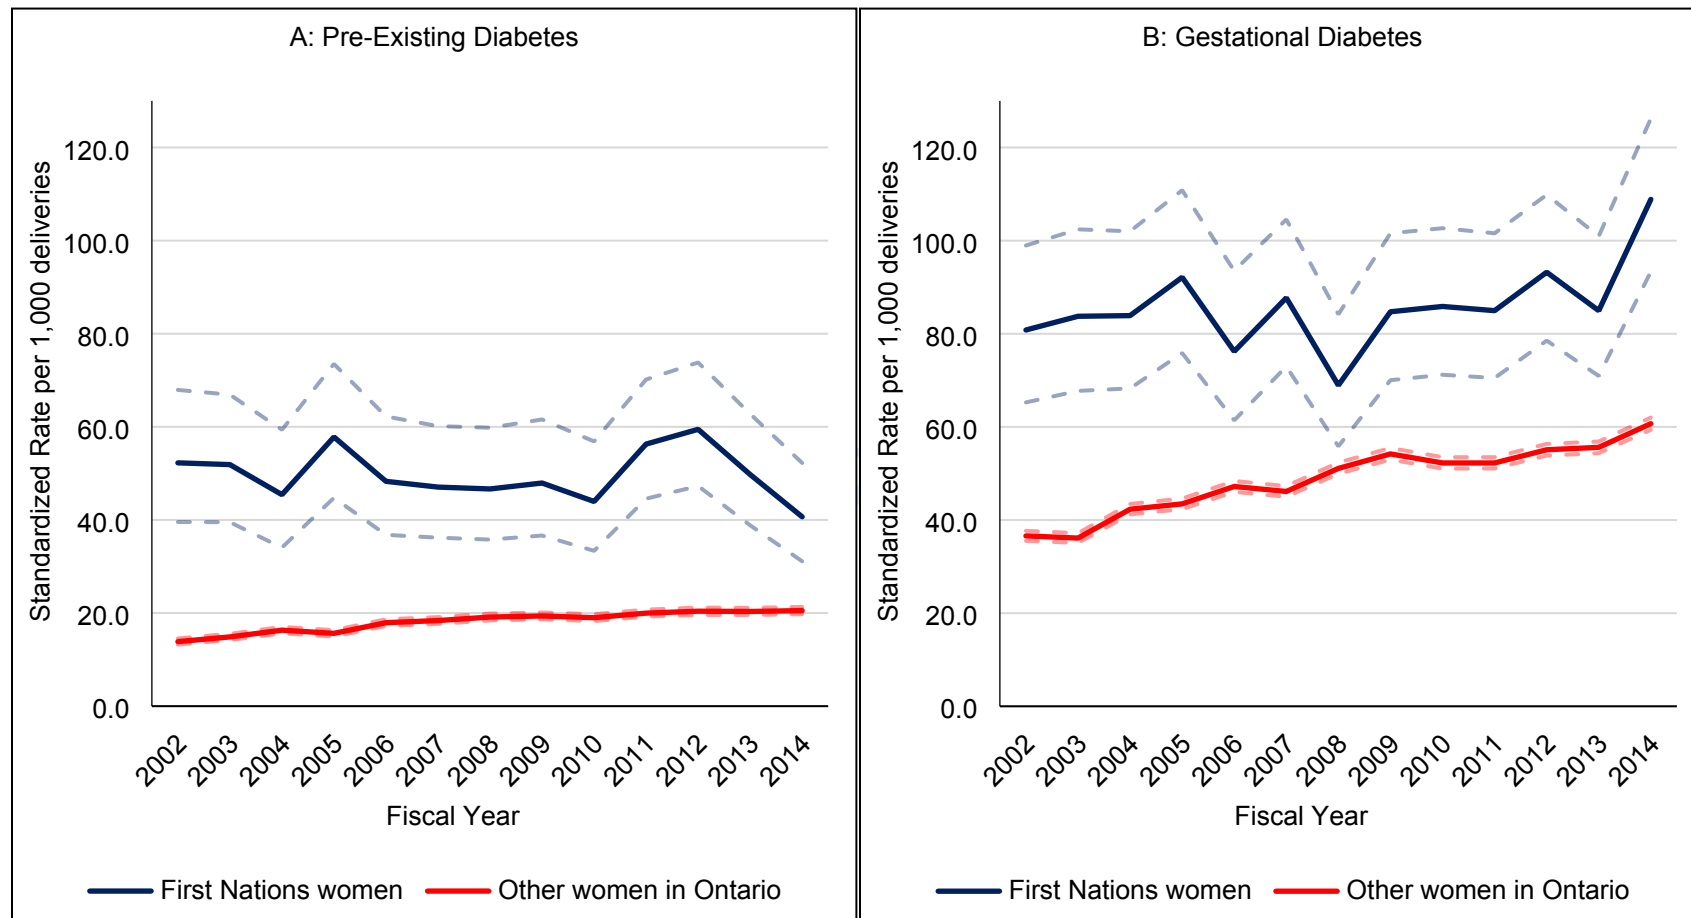

Supplement: 2019-0195-original-submission.pdf [file 2019-0195-original-submission.pdf]
